# Supplementary material for: Catalytic production of 1,2-propanediol from sucrose over a functionalized Pt/deAl-beta zeolite catalyst
Source: Royal Society of Chemistry journal article supplement (doi:10.1039/d2ra07097a), 2023-01-01
Supplement: d2ra07097a3.pdf [file d2ra07097a3.pdf]

# Supplementary Materials

## Catalytic production of 1,2-propanediol from sucrose over functionalized Pt/deAl-Beta zeolite catalyst

Shizhuo Wang <sup>a</sup>, Jikang Jiang <sup>a</sup>, Minyan Gu <sup>a</sup>, Zheng Shen<sup>\*a</sup>

<sup>a</sup> State Key Laboratory of Pollution Control and Resources Reuse, Key Laboratory of Yangtze River Water  
Environment of MOE, Tongji University, Shanghai, 200092, China

\*E-mail: shenzheng@tongji.edu.cn, Tel/Fax: 86-21-65985811.

The supplementary Figures and Tables

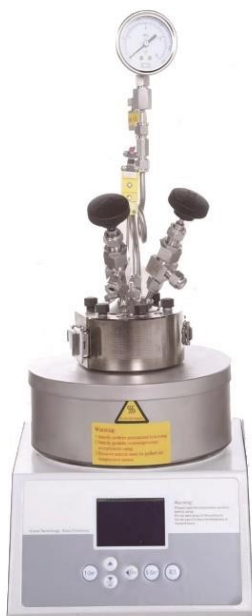

Fig.S1 High-pressure hydrothermal reactor.

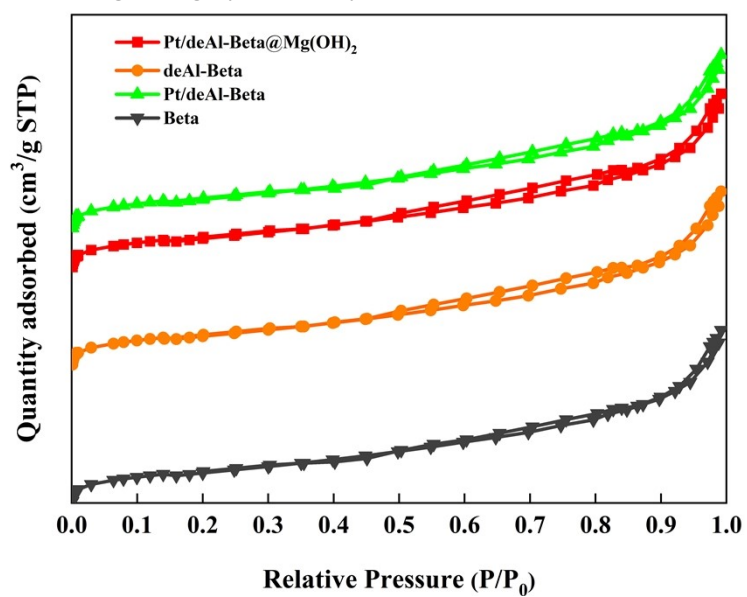

Fig.S2 The Nitrogen adsorption-desorption isotherms of different catalysts.

**Table S1** The acid sites of Pt/deAl-Beta and Pt/deAl-Beta@Mg(OH)<sub>2</sub> catalysts

| catalyst                                             | Temperature<br>°C | B acidity <sup>a</sup><br>m mol/g | L acidity <sup>b</sup><br>m mol/g | total acidity<br>m mol/g | B acidity<br>proportion % |
|------------------------------------------------------|-------------------|-----------------------------------|-----------------------------------|--------------------------|---------------------------|
| Pt/deAl-Beta                                         | 150               | 0.02                              | 0.43                              | 0.45                     | 4.44                      |
|                                                      | 250               | 0.01                              | 0.28                              | 0.28                     | 3.45                      |
|                                                      | 350               | 0.00                              | 0.04                              | 0.04                     | 0.00                      |
|                                                      | 450               | 0.00                              | 0.02                              | 0.02                     | 0.00                      |
| Pt/deAl-<br>Beta@5Mg(OH) <sub>2</sub> <sup>c</sup>   | 150               | 0.01                              | 0.14                              | 0.15                     | 5.63                      |
|                                                      | 250               | 0.00                              | 0.03                              | 0.03                     | 0                         |
|                                                      | 350               | 0.00                              | 0.03                              | 0.03                     | 0                         |
|                                                      | 450               | 0.00                              | 0.02                              | 0.02                     | 0                         |
| Pt/deAl-<br>Beta@7.5Mg(OH) <sub>2</sub> <sup>c</sup> | 150               | 0.02                              | 0.38                              | 0.40                     | 5.00                      |
|                                                      | 250               | 0.01                              | 0.21                              | 0.22                     | 4.55                      |
|                                                      | 350               | 0.00                              | 0.08                              | 0.08                     | 0.00                      |
|                                                      | 450               | 0.00                              | 0.02                              | 0.02                     | 0.00                      |

<sup>a</sup> The B acidity represents Brønsted acidity. <sup>b</sup> The L represents Lewis acidity. <sup>c</sup> The Pt loading of the catalyst is 3.0 wt %, and the number represents the mass fraction of the load.
