# Supplementary figures and images for: Catalytic production of 1,2-propanediol from sucrose over a functionalized Pt/deAl-beta zeolite catalyst
Source: Royal Society of Chemistry journal article supplement (doi:10.1039/d2ra07097a), 2023-01-01

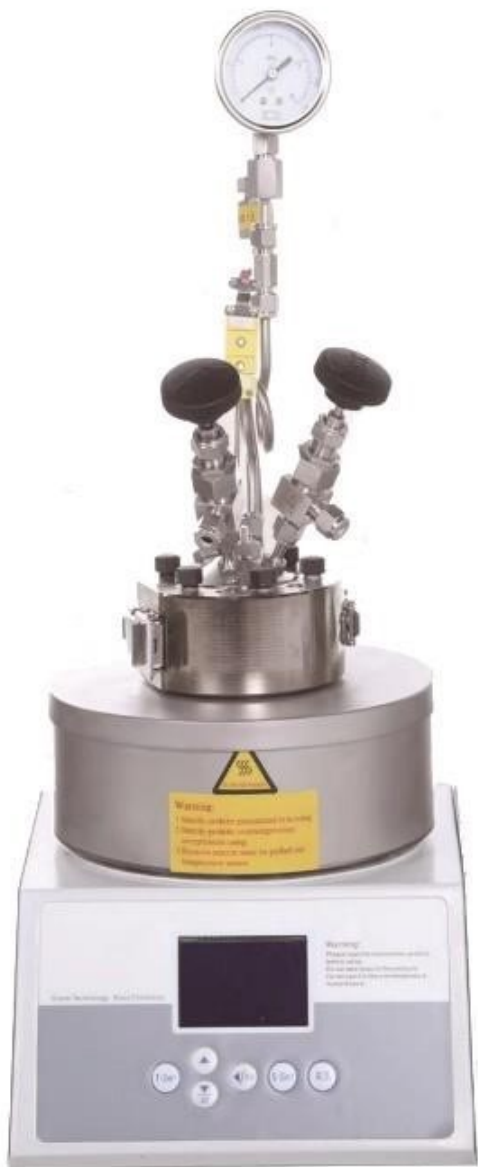

Supplement: d2ra07097a1.pdf [file d2ra07097a1.pdf]

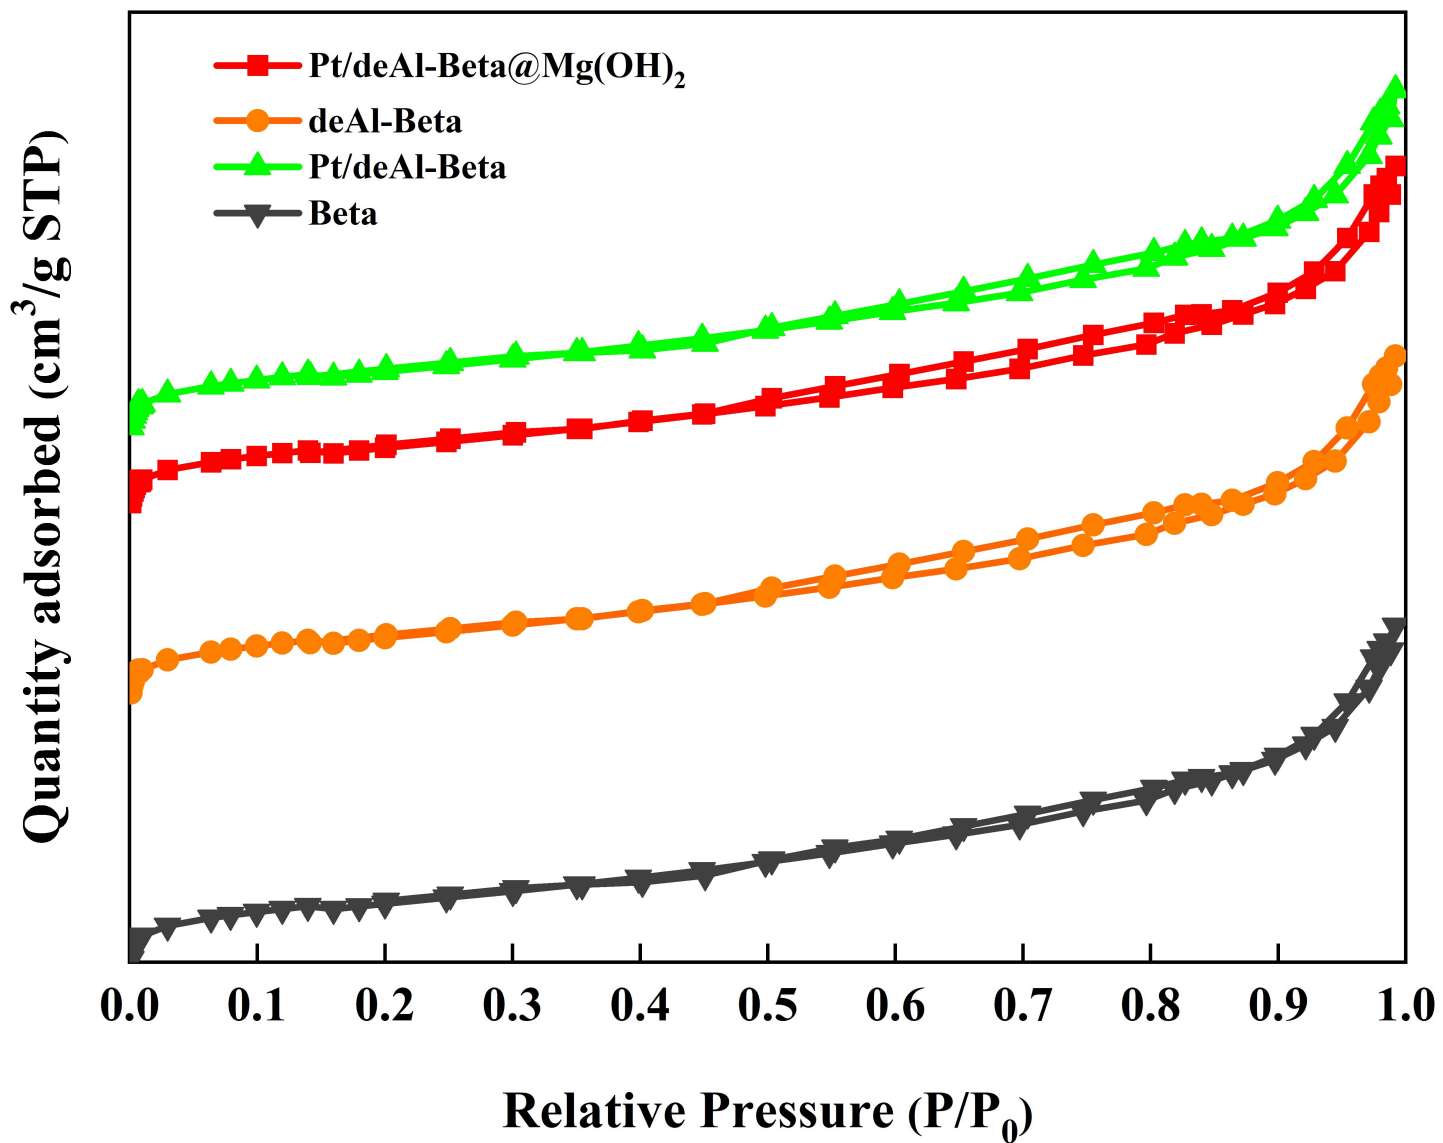

Supplement: d2ra07097a2.pdf [file d2ra07097a2.pdf]
